# Supplementary material
Source: publisher site journal article supplement (https://www.dovepress.com/article/364175)
Supplement: Supplementary file 1 [file get_supplementary_file.php]

## Supplementary materials

**Table S1:** Effects of extracts on microbes.

| Serial # | Solvents          | <i>Streptococcus mutans</i> | <i>Enterococcus faecalis</i> | <i>Staphylococcus spp.</i> | <i>Lactobacillus spp.</i> |
|----------|-------------------|-----------------------------|------------------------------|----------------------------|---------------------------|
| 1        | Ethanol           | +                           | +                            | +                          | +                         |
| 2        | Chloroform        | -                           | -                            | -                          | +                         |
| 3        | Ethyl Acetate     | +                           | +                            | +                          | +                         |
| 4        | Distilled water   | -                           | -                            | -                          | -                         |
| 5        | <i>n</i> -Butanol | -                           | -                            | +                          | +                         |
| 6        | <i>n</i> -Hexane  | -                           | +                            | +                          | +                         |
| 7        | DMSO              | -                           | -                            | -                          | -                         |

**Table S2:** Percentage scavenging effects of IC<sub>50</sub> of antioxidant assays for CME and Fractions.

| Extracts          | Scavenging effects (%) at different concentrations $\pm$ STDEV* |                  |                  |                 |                  |                 | IC <sub>50</sub> mg/ml |
|-------------------|-----------------------------------------------------------------|------------------|------------------|-----------------|------------------|-----------------|------------------------|
|                   | 1mg/ml                                                          | 0.5mg/ml         | 0.25mg/ml        | 0.01mg/ml       | 0.05mg/ml        | 0.025mg/ml      |                        |
| Ethanol           | 52.4 $\pm$ 0.76                                                 | 33.8 $\pm$ 0.21  | 34.5 $\pm$ 0.03  | 23.5 $\pm$ 0.36 | 22.42 $\pm$ 0.05 | 10.4 $\pm$ 0.26 | 52.4                   |
| <i>n</i> -hexane  | 90.6 $\pm$ 0.20                                                 | 34.8 $\pm$ 0.15  | 26.02 $\pm$ 0.77 | 21.7 $\pm$ 0.07 | 15.8 $\pm$ 0.19  | 16.2 $\pm$ 0.17 | 90.6                   |
| Chloroform        | 85.6 $\pm$ 0.05                                                 | 73.05 $\pm$ 0.04 | 50.4 $\pm$ 0.08  | 33.3 $\pm$ 0.03 | 9.4 $\pm$ 0.11   | 10.3 $\pm$ 0.03 | 85.6                   |
| Ethyl acetate     | 82.9 $\pm$ 0.79                                                 | 60.9 $\pm$ 0.25  | 71.2 $\pm$ 0.92  | 49.7 $\pm$ 0.19 | 8.61 $\pm$ 0.07  | 4.69 $\pm$ 0.02 | 82.9                   |
| <i>n</i> -butanol | 91.2 $\pm$ 0.04                                                 | 83.1 $\pm$ 0.01  | 50.8 $\pm$ 0.02  | 17.9 $\pm$ 0.02 | 15.6 $\pm$ 0.12  | 10.5 $\pm$ 0.04 | 91.2                   |
| Distilled Water   | 43.9 $\pm$ 0.03                                                 | 12.8 $\pm$ 0.02  | 11.6 $\pm$ 0.12  | 9.6 $\pm$ 0.12  | 7.4 $\pm$ 0.01   | 7.06 $\pm$ 0.02 | 43.9                   |
| Ascorbic acid     | 95 $\pm$ 0.27                                                   | 94.8 $\pm$ 0.27  | 90 $\pm$ 0.27    | 66.4 $\pm$ 0.27 | 44.7 $\pm$ 0.27  | 30 $\pm$ 0.27   | 95                     |

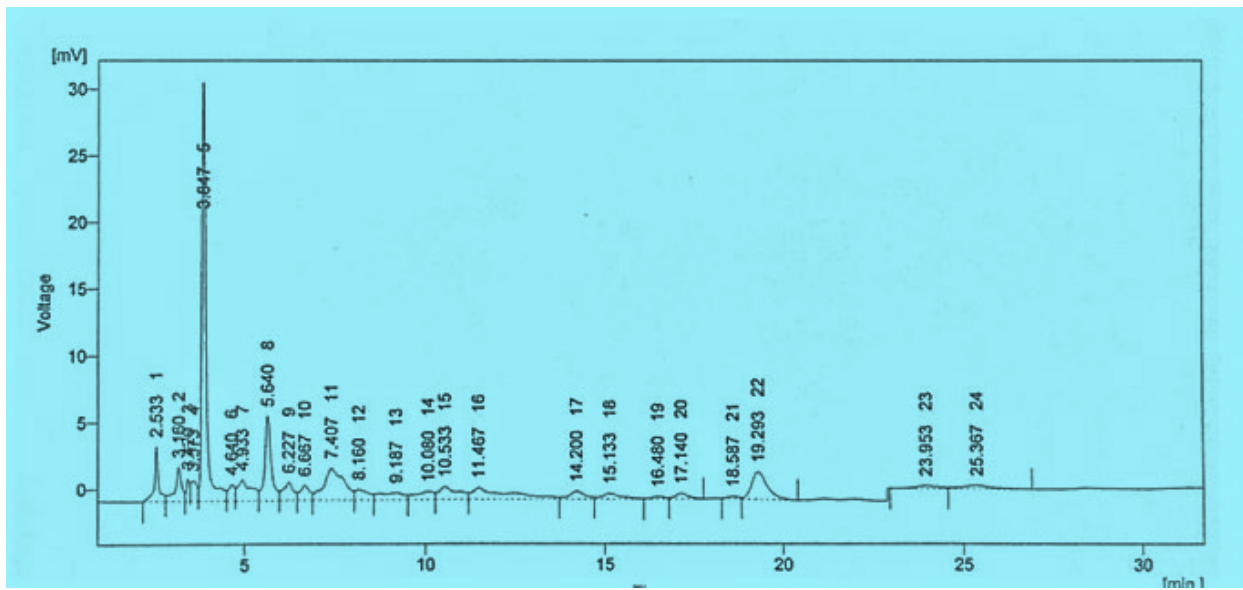

**Figure S1:** HPLC chromatogram of Ethanol extract of Ginger.

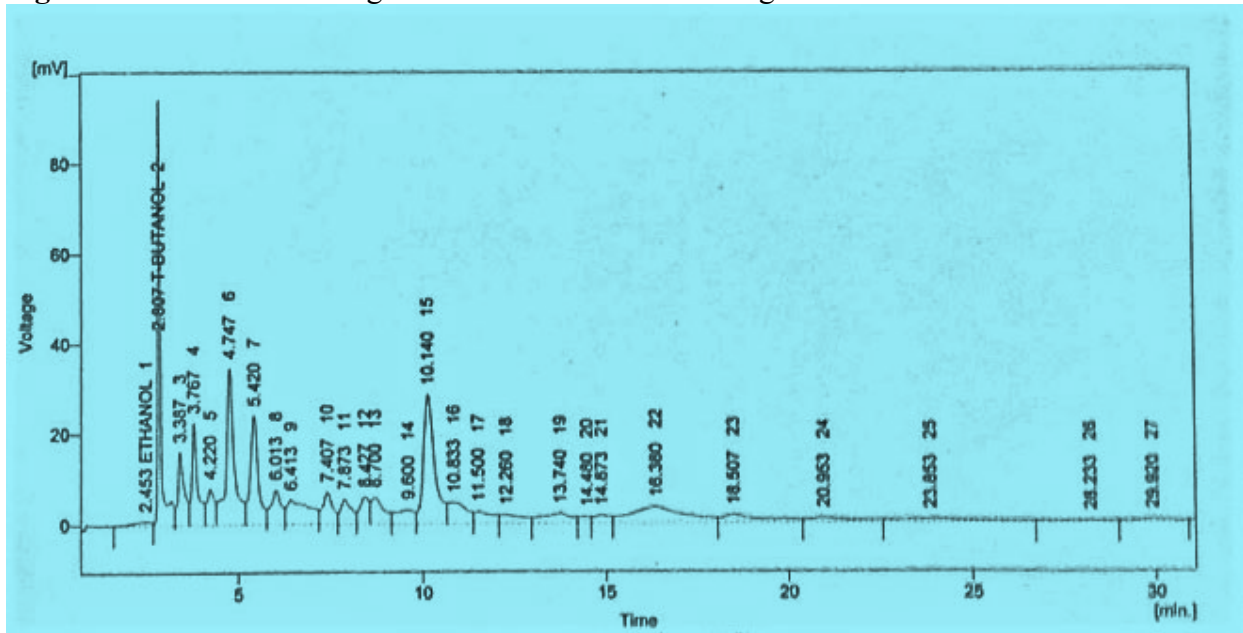

**Figure S2:** HPLC chromatogram of Water extract of Ginger.

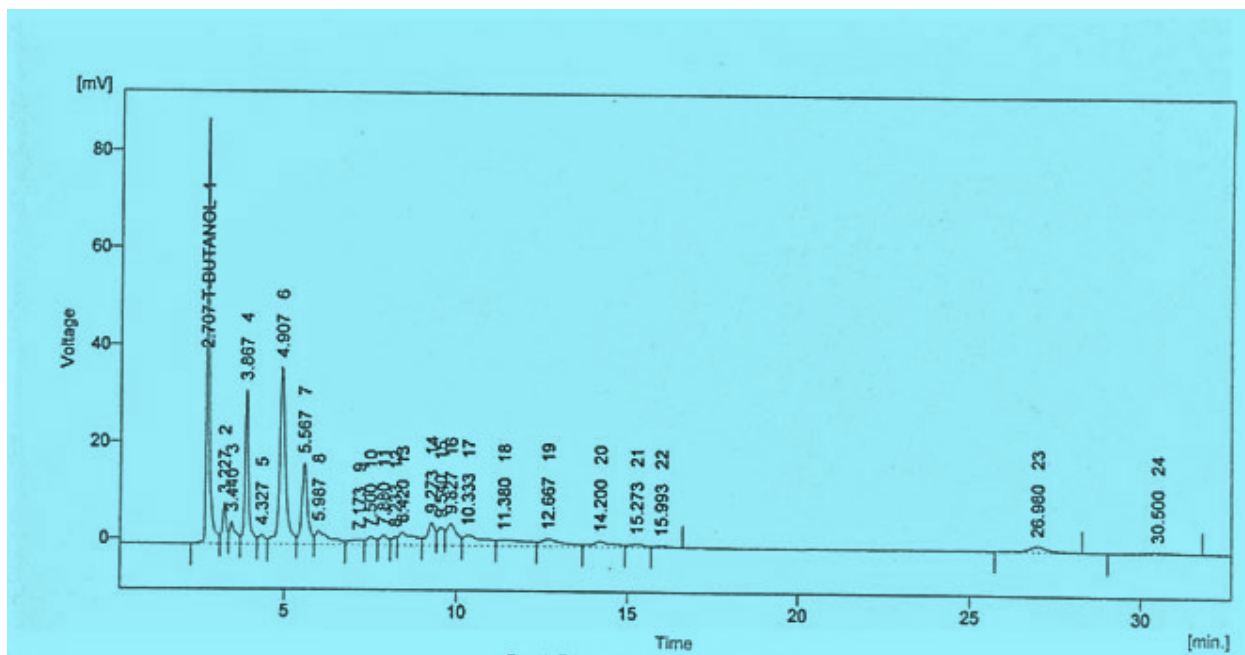

Figure S3: HPLC chromatogram of N-Hexane extract of Ginger.

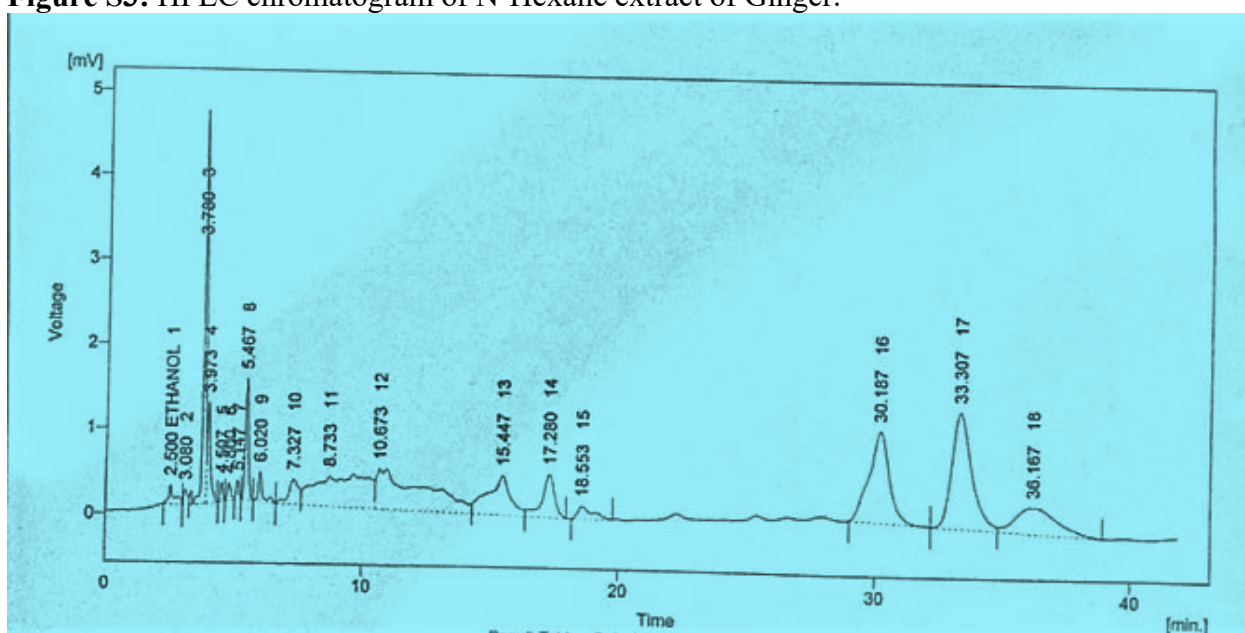

Figure S4: HPLC chromatogram of N-Butanol extract of Ginger.

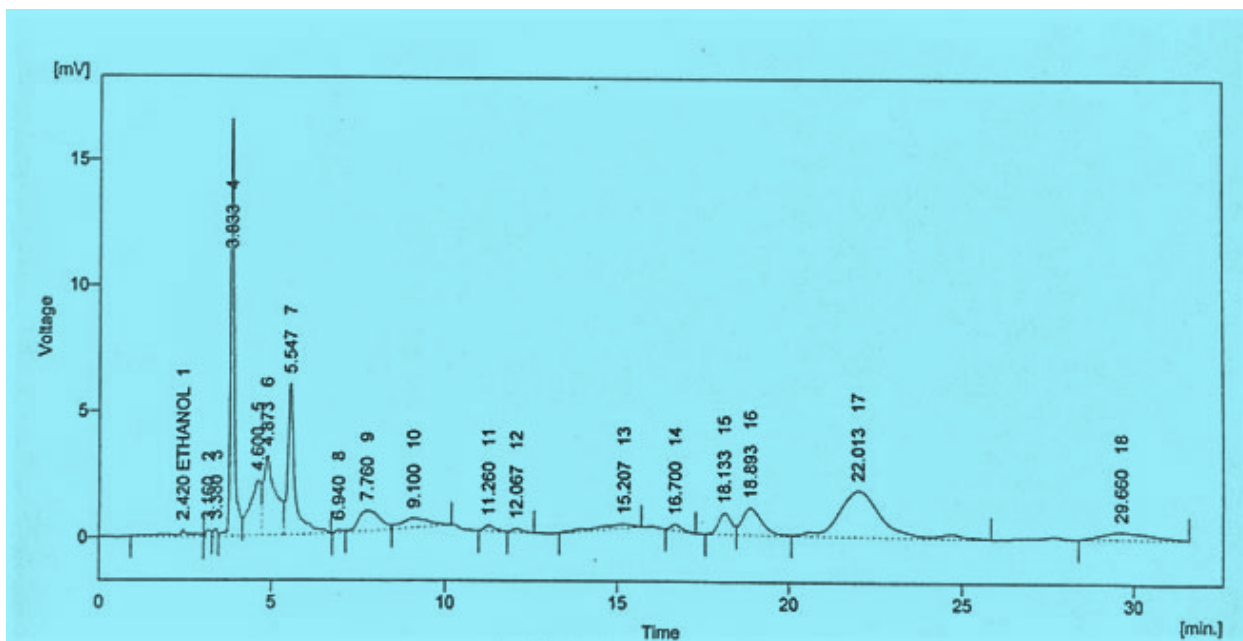

Figure S5: HPLC chromatogram of Ethyl Acetate extract of Ginger.

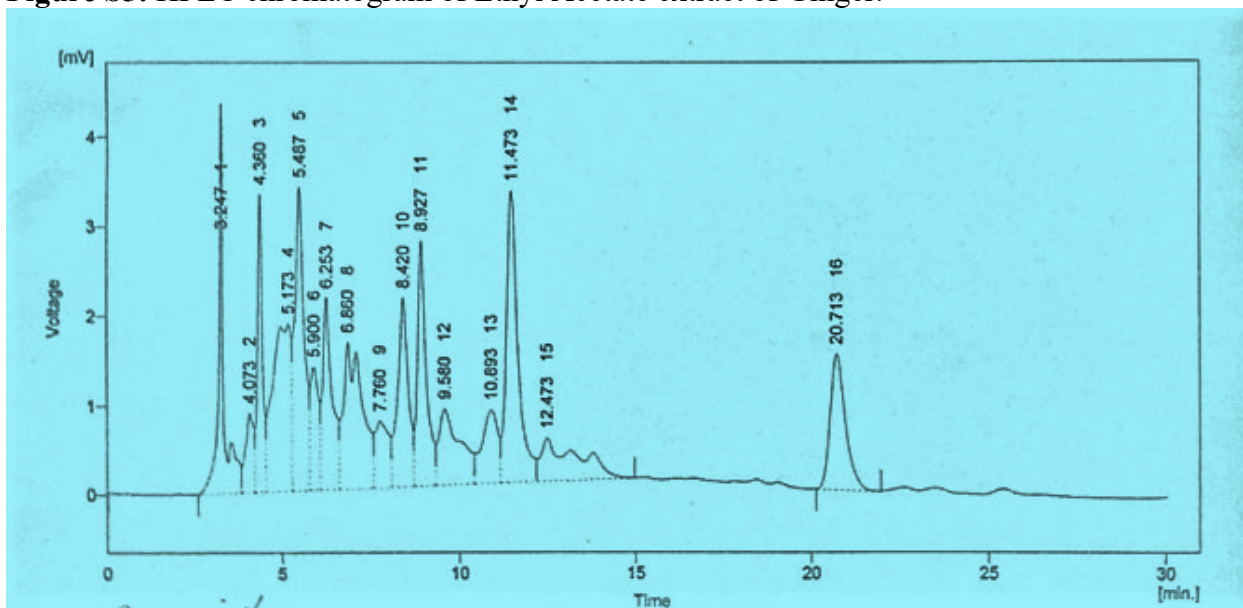

Figure S6: HPLC chromatogram of Chloroform extract of Ginger.
